# Supplementary material
Source: MDPI journal article supplement (https://www.mdpi.com/2073-4344/11/11/1257)
Supplement: s1 [file s1]

# Supplementary

|             |                                                                                                                         |                           |                    |     |
|-------------|-------------------------------------------------------------------------------------------------------------------------|---------------------------|--------------------|-----|
| WP096204770 | *****                                                                                                                   | *****                     | *****              | 120 |
| EhLCD       | MKWMNAVCAALLAVAGPAFCGAPAESPRDYAYGLSLDTSASSPWYRVMLPLAVYQQSTSPDLRDVRFVFNQSGEPVPPFSLVTTTPQPAPTTLALRLFALNASPGGEEDSGDKIMLRAR | -----VMLPLAVYQQST-----    | -----PQPAPTTL----- | 38  |
| WP096204770 | *****                                                                                                                   | *****                     | *****              | 240 |
| EhLCD       | NGVEIVLEGQHAAAGQHYLLTLPENATEVPLSQLQLFWDTPQGSWQGTASVYYSEDLNWYTLREEMPLLDVMSGQDRKLDRIDTDLVLSPEANRYLLVLNTGRSALTLTGVNAINA    | -----TPQGSWQGTASVYY-----  | -----NAINA         | 57  |
| WP096204770 | *****                                                                                                                   | *****                     | *                  | 360 |
| EhLCD       | TEQPESEHISLAGEGERLSESEAVWRWKHPQLSAIGFMLNGDGVLPABIAWREADKDRNHTLKKEVIYQLGGKTSEPVLPGGLVEAVKIKTLNARLPENLPGVTGQRVRYDLVFNAQG  | -----VKIKTLNARLPENLP----- | -----G             | 83  |
| WP096204770 | *****                                                                                                                   | *****                     |                    | 459 |
| EhLCD       | KGPYLLAWNGAAXPASVETDMLIPTELRKYDLAALPMADTLEPVPLGGEARLTATSAAEQESRMKTLMVWGVLIAGVMVLGMAWRLWREVKKDGAA                        | -----AGVMVLGMAWR-----     |                    | 106 |

Figure.S1. Mass spectrometry analysis of the trypsin-digested EhLCD.

The DUF3999 domain-containing protein (WP\_096204770) of *Enterobacter hormaechei*, and those of the eight fragments of purified EhLCD determined by MALDI-TOF MS are shown.
